# Supplementary figures and images for: Genetic structure of nomadic Bedouin from Kuwait
Source: Springer Nature journal article supplement (doi:10.1038/hdy.2009.72), 2009-07-29

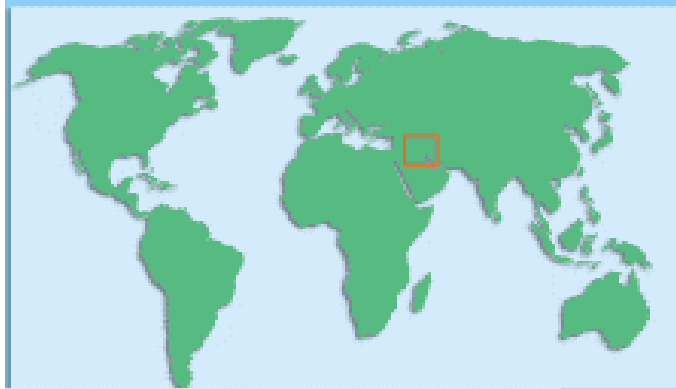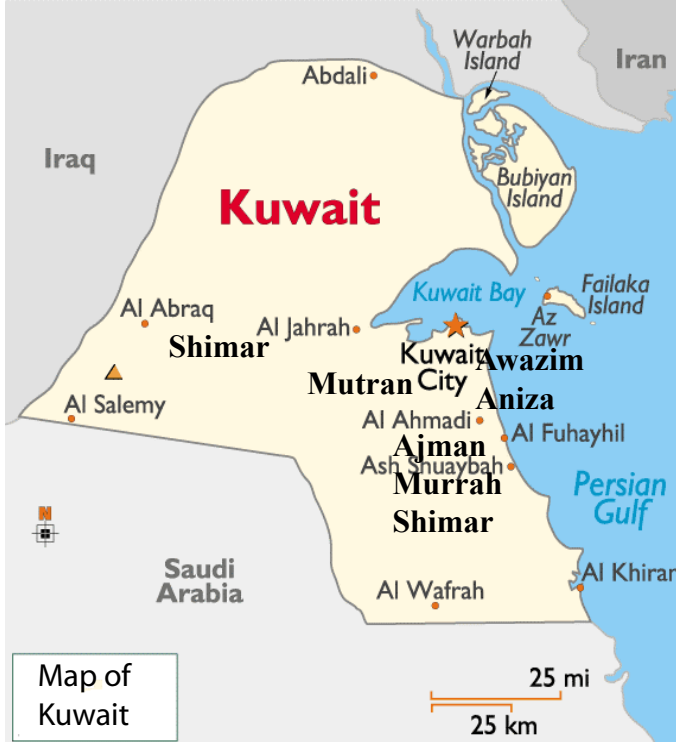

Supplement: 41437_2009_BFhdy200972_MOESM2_ESM.pdf [file 41437_2009_BFhdy200972_MOESM2_ESM.pdf]
